# Supplementary material for: Ru-Based CO releasing molecules with azole ligands: interaction with proteins and the CO release mechanism disclosed by X-ray crystallography
Source: Royal Society of Chemistry journal article supplement (doi:10.1039/c7dt01991b), 2017-01-01
Supplement: c7dt01991b1.pdf [file c7dt01991b1.pdf]

Cite this: DOI: 10.1039/c0xx00000x

[www.rsc.org/xxxxxx](http://www.rsc.org/xxxxxx)

**ARTICLE TYPE**

**Supplementary information**

**Ru-based CO releasing molecules with azole ligands: interaction with proteins and CO release mechanism disclosed by X-ray crystallography**

*Nicola Pontillo, ‡ Giarita Ferraro, ‡ Luigi Messori, # Gabriella Tamasi, † Antonello Merlino‡,\**

*Received (in XXX, XXX) Xth XXXXXXXXXX 20XX, Accepted Xth XXXXXXXXXX 20XX*

DOI: 10.1039/b00000

| <b>Table S1.</b> Data collection and refinement statistics for HEWL-Ru <sup>III</sup> IM, HEWL-Ru <sup>III</sup> MIM, RNase A-Ru <sup>III</sup> IM, RNase A-Ru <sup>III</sup> MIM and RNase A-Ru <sup>III</sup> MBI structures |                                        |                                        |                                        |                                                                        |                                                                                         |                                                                                          |                                                                                         |
|--------------------------------------------------------------------------------------------------------------------------------------------------------------------------------------------------------------------------------|----------------------------------------|----------------------------------------|----------------------------------------|------------------------------------------------------------------------|-----------------------------------------------------------------------------------------|------------------------------------------------------------------------------------------|-----------------------------------------------------------------------------------------|
|                                                                                                                                                                                                                                | HEWL-Ru <sup>III</sup> IM              | HEWL-Ru <sup>III</sup> IM              | HEWL-Ru <sup>III</sup> MIM             | HEWL-Ru <sup>III</sup> MIM                                             | RNase A-Ru <sup>III</sup> IM                                                            | RNase A-Ru <sup>III</sup> MIM                                                            | RNase A-Ru <sup>III</sup> MBI                                                           |
|                                                                                                                                                                                                                                | First structure                        | Second structure                       | Crystals grown using NaCl              | Crystals grown using ethylene glycol                                   |                                                                                         |                                                                                          |                                                                                         |
| PDB code                                                                                                                                                                                                                       |                                        |                                        |                                        |                                                                        |                                                                                         |                                                                                          |                                                                                         |
| Crystallization conditions                                                                                                                                                                                                     | 1.1M NaCl, 0.1 M sodium acetate pH 4.4 | 1.1M NaCl, 0.1 M sodium acetate pH 4.0 | 1.1M NaCl, 0.1 M sodium acetate pH 4.0 | 20% Ethylene glycol, 0.1 M sodium acetate pH 4.0, 0.6 M sodium nitrate | 18% PEG4K, 10 mM sodium citrate pH 5.1<br>Soaking: 4 days<br>Ligand concentration: 5 mM | 22% PEG4K, 10 mM sodium citrate pH 5.1<br>Soaking: 14 days<br>Ligand concentration: 5 mM | 22% PEG4K, 10 mM sodium citrate pH 5.1<br>Soaking: 3 days<br>Ligand concentration: 5 mM |
| Space group                                                                                                                                                                                                                    | P4 <sub>3</sub> 2 <sub>1</sub> 2                                       | C2                                                                                      | C2                                                                                       | C2                                                                                      |
| Unit cell parameters                                                                                                                                                                                                           |                                        |                                        |                                        |                                                                        |                                                                                         |                                                                                          |                                                                                         |
| a,b,c (Å)                                                                                                                                                                                                                      | 79.78, 79.78, 36.64                    | 78.97, 78.97, 36.60                    | 78.57, 78.57, 36.66                    | 77.74, 77.74, 37.17                                                    | 100.55, 32.67, 74.69                                                                    | 99.63, 32.77, 72.25                                                                      | 100.65, 32.98, 73.05                                                                    |
| β (°)                                                                                                                                                                                                                          | 90.0                                   | 90.0                                   | 90.0                                   | 90.0                                                                   | 90.5                                                                                    | 90.0                                                                                     | 90.2                                                                                    |
| Molecules per asymmetric unit                                                                                                                                                                                                  | 1                                      | 1                                      | 1                                      | 1                                                                      | 2                                                                                       | 2                                                                                        | 2                                                                                       |
| Observed reflections                                                                                                                                                                                                           | 51100                                  | 20497                                  | 46898                                  | 18791                                                                  | 46153                                                                                   | 36034                                                                                    | 50056                                                                                   |
| Unique reflections                                                                                                                                                                                                             | 9931                                   | 6694                                   | 9488                                   | 4846                                                                   | 14981                                                                                   | 15576                                                                                    | 21285                                                                                   |
| Resolution                                                                                                                                                                                                                     | 56.41-1.88                             | 55.84-2.10                             | 55.56-1.85                             | 54.97-2.38                                                             | 74.68-2.07                                                                              | 72.25-1.98                                                                               | 73.05-1.82                                                                              |

|                                      |                               |                |               |               |                |               |               |
|--------------------------------------|-------------------------------|----------------|---------------|---------------|----------------|---------------|---------------|
| (Å)                                  | (1.91-1.88)                   | (2.14-2.10)    | (1.88-1.85)   | (2.42-2.38)   | (2.11-2.07)    | (2.01-1.98)   | (1.85-1.82)   |
| Completeness (%)                     | 98.2 (100)                    | 93.3 (93.3)    | 92.3 (86.3)   | 98.1 (97.9)   | 99.0 (94.2)    | 92.2 (81.9)   | 97.6 (95.4)   |
| Rmerge†                              | 0.091 (0.597)                 | 0.057 (0.296)  | 0.048 (0.603) | 0.099 (0.691) | 0.085 (0.548)  | 0.103 (0.448) | 0.072 (0.384) |
| I/σ(I)                               | 13.3 (2.7)                    | 11.4 (4.2)     | 36.8 (2.3)    | 15.6 (2.3)    | 9.5 (2.0)      | 8.2 (2.2)     | 6.3 (1.7)     |
| Multiplicity                         | 5.1 (3.2)                     | 3.1 (2.8)      | 4.9 (3.0)     | 3.9 (3.6)     | 3.1 (2.5)      | 2.3 (1.7)     | 2.4 (1.4)     |
| Refinement                           |                               |                |               |               |                |               |               |
| Resolution (Å)                       | 56.41-1.88                    | 55.84-2.10     | 55.56-1.85    | 54.97-2.38    | 74.68-2.07     | 72.251.98     | 73.051.82     |
| number of reflections in working set | 9428                          | 6307           | 8981          | 4597          | 14224          | 14790         | 20184         |
| number of reflections in test set    | 477                           | 310            | 457           | 228           | 755            | 785           | 1091          |
| R factor/Rfree (%)                   | 17.5/24.2                     | 15.3/23.4      | 16.0/23.2     | 18.8/30.8     | 18.1/27.2      | 17.6/27.9     | 16.5/23.6     |
| Number of non-H atoms                | 1256                          | 1234           | 1201          | 1147          | 2139           | 2385          | 2423          |
| Number of Ru containing fragments    | 5                             | 3              | 2             | 2             | 3              | 2             | 2             |
| Occupancy of Ru atoms                | 0.8/0.5/0.3-0.3/0.3/0.5/0.3   | 0.8/0.5/0.3    | 0.8/0.4       | 0.4/0.6       | 0.4/0.4/0.6    | 0.7/0.7       | 0.6/0.5       |
| B-factor of Ru atoms                 | 38.6/54.8/52.1-52.5/58.5/50.0 | 44.2/51.0/46.4 | 43.4/56.7     | 55.1/49.1     | 54.4/52.7/52.8 | 51.5/61.8     | 44.0/58.8     |
| Overall B-factor                     | 32.20                         | 33.79          | 33.26         | 40.28         | 42.10          | 30.53         | 30.82         |
| Ramachandran values (%)              |                               |                |               |               |                |               |               |
| Preferred/Allowed/Outl               | 97.2/2.8/0.0                  | 97.2/2.8/0.0   | 97.5/2.5/0.0  | 96.1/3.9/0.0  | 95.8/3.4/0.8   | 92.3/5.0/2.7  | 95.1/2.2/2.7  |

|                       |       |       |       |       |       |       |       |
|-----------------------|-------|-------|-------|-------|-------|-------|-------|
| iers                  |       |       |       |       |       |       |       |
| R.m.s.d.<br>bonds(Å)  | 0.021 | 0.016 | 0.023 | 0.013 | 0.014 | 0.015 | 0.016 |
| R.m.s.d.<br>angles(°) | 1.87  | 1.674 | 1.913 | 1.626 | 1.726 | 1.626 | 1.771 |



|        |                                                                                                           |                                                      |                                                         |                                                                                                 |                                                               |                                                               | rmsd, e <sup>-</sup><br>/Å <sup>3</sup><br>10.8;<br>0.24                          | rmsd, e <sup>-</sup><br>/Å <sup>3</sup><br>5.4;<br>0.27                           | rmsd, e <sup>-</sup><br>/Å <sup>3</sup><br>4.2;<br>0.20                           | rmsd, e <sup>-</sup><br>/Å <sup>3</sup><br>3.1;<br>0.13 |  |  |
|--------|-----------------------------------------------------------------------------------------------------------|------------------------------------------------------|---------------------------------------------------------|-------------------------------------------------------------------------------------------------|---------------------------------------------------------------|---------------------------------------------------------------|-----------------------------------------------------------------------------------|-----------------------------------------------------------------------------------|-----------------------------------------------------------------------------------|---------------------------------------------------------|--|--|
| Asp18  | Ru<br>(0.5; 25.7)<br><b>CO</b><br>CO<br>Cl<br>Cl<br><br>Ru<br>(0.5; 27.9)<br><b>CO</b><br>CO<br>Wat<br>Cl | Ru<br>(0.5; 29.5)<br><br><br>Ru<br>(0.5; 28.1)<br>Cl | Ru<br>(0.65;<br>32.6)<br><b>Wat</b><br>CO<br>Wat<br>Wat | Ru<br>(0.50;<br>23.1)<br><b>Wat</b><br>Wat<br>Ru<br>(0.50;<br>25.4)<br><b>Wat</b><br>Wat<br>Wat | Ru<br>(0.50;<br>41.7)<br><b>Wat</b><br>CO<br>CO<br>Wat<br>Wat | Ru<br>(0.5;<br>54.8)<br><b>Wat</b><br>CO<br>Wat<br>Wat<br>Wat | Ru<br>(0.5;<br>51.0)<br><b>Wat</b><br>CO<br>CO<br>Wat<br>Wat<br>Wat               | Ru<br>(0.4;<br>56.7)<br><b>Wat</b><br>CO<br>CO<br>Wat<br>Wat<br>Wat               |                                                                                   |                                                         |  |  |
|        |                                                                                                           |                                                      |                                                         |                                                                                                 |                                                               |                                                               | Anomal<br>ous<br>peak:<br>rmsd, e <sup>-</sup><br>/Å <sup>3</sup><br>3.7;<br>0.08 | Anomal<br>ous<br>peak:<br>rmsd, e <sup>-</sup><br>/Å <sup>3</sup><br>2.9;<br>0.14 | Anomal<br>ous<br>peak:<br>rmsd, e <sup>-</sup><br>/Å <sup>3</sup><br>2.6;<br>0.13 |                                                         |  |  |
| Asp52  | Ru<br>(0.35;<br>29.4)<br><b>Wat</b><br>Wat<br>Wat                                                         | Ru<br>(0.3; 22.5)<br><br>x<br>Wat<br>Wat<br>Wat      | Ru<br>(0.5;<br>32.2)<br><b>Wat</b><br>Wat<br>Wat        | Ru<br>(0.40;<br>42.1)<br><b>x</b><br>CO<br>Wat<br>Wat                                           | Ru<br>(0.40;<br>32.7)<br><b>Wat</b><br>CO<br>CO<br>Wat<br>Wat | Ru<br>(0.40; 32.7)<br><b>Wat</b><br>CO<br>CO<br>Wat<br>Wat    | Ru A/B<br>(0.3/0.3;<br>52.1/52.<br>5)<br><b>Wat</b>                               |                                                                                   |                                                                                   |                                                         |  |  |
|        |                                                                                                           |                                                      |                                                         |                                                                                                 |                                                               |                                                               | Anomal<br>ous<br>peak:<br>rmsd, e <sup>-</sup><br>/Å <sup>3</sup><br>3.1;<br>0.07 |                                                                                   |                                                                                   |                                                         |  |  |
| Asp101 | Ru<br>(0.10;<br>33.7)<br><br>Ru<br>(0.10;<br>26.9)                                                        | Ru<br>(0.1; 25.5)<br><br>Ru<br>(0.1; 45.5)           |                                                         | Ru<br>(0.70;<br>22.5)<br><b>x</b><br>Wat<br>Wat                                                 | Ru<br>(0.65;<br>56.9)<br><b>Wat</b><br>Wat<br>Wat             |                                                               |                                                                                   |                                                                                   |                                                                                   |                                                         |  |  |

|        |                   |                                            |                                                  |                                                                     |                                             |  |                                                                                           |                                                                        |  |                                                                                   |  |
|--------|-------------------|--------------------------------------------|--------------------------------------------------|---------------------------------------------------------------------|---------------------------------------------|--|-------------------------------------------------------------------------------------------|------------------------------------------------------------------------|--|-----------------------------------------------------------------------------------|--|
|        |                   |                                            |                                                  | Wat<br><br>Ru<br>(0.70;<br>21.8)<br><b>Wat</b><br>Wat<br>Wat<br>Wat | Wat<br><br>Ru<br>(0.65;<br>81.0)<br><br>Wat |  |                                                                                           |                                                                        |  |                                                                                   |  |
| Asp119 | Ru<br>(0.5; 42.4) | Ru<br>(0.3; 31.8)<br>Cl                    | Ru<br>(0.5;<br>51.3)<br><b>Wat</b><br>Wat<br>Wat | Ru<br>(0.70;<br>23.1)<br><b>Wat</b><br>CO<br>Wat<br>Wat<br>Wat      |                                             |  | Ru<br>(0.5;<br>58.5)<br><b>CO</b><br>CO                                                   | Ru<br>(0.3;<br>42.3)<br><br>Wat                                        |  | Ru<br>(0.6;49.<br>1)<br><b>CO</b><br>CO<br>CO<br>Wat<br>OE1<br>Gln121             |  |
|        |                   |                                            |                                                  |                                                                     |                                             |  | Anomal<br>ous<br>peak:<br>rmsd, e <sup>-</sup><br>/Å <sup>3</sup><br>3.5;<br>0.08         | Anomal<br>ous<br>peak:<br>rmsd, e <sup>-</sup><br>/Å <sup>3</sup><br>- |  | Anomal<br>ous<br>peak:<br>rmsd, e <sup>-</sup><br>/Å <sup>3</sup><br>4.8;<br>0.20 |  |
| Leu129 | Ru<br>(0.5; 43.7) | Ru<br>(0.3; 27.4)<br><br>Ru<br>(0.5; 29.9) |                                                  |                                                                     |                                             |  | Ru<br><br>(0.3;<br>58.5)<br><br>Wat<br><br>Wat<br><br>Wat                                 |                                                                        |  |                                                                                   |  |
|        |                   |                                            |                                                  |                                                                     |                                             |  | Anomal<br>ous<br>peak:<br><br>rmsd, e <sup>-</sup><br>/Å <sup>3</sup><br><br>4.0;<br>0.09 |                                                                        |  |                                                                                   |  |

| <b>Table S3.</b> Root Mean Square Deviations values (Å) computed on CA atoms among HEWL adducts formed with Ru <sup>II</sup> IM, Ru <sup>II</sup> MIM and Ru <sup>II</sup> MBI. |                                                     |                                                         |                                                                      |                                                                                    |
|---------------------------------------------------------------------------------------------------------------------------------------------------------------------------------|-----------------------------------------------------|---------------------------------------------------------|----------------------------------------------------------------------|------------------------------------------------------------------------------------|
|                                                                                                                                                                                 | HEWL-<br>Ru <sup>II</sup> IM<br><br>First structure | HEWL-<br>Ru <sup>II</sup> IM<br><br>Second<br>structure | HEWL-<br>Ru <sup>II</sup> MIM<br><br>Crystals<br>grown using<br>NaCl | HEWL-<br>Ru <sup>II</sup> MIM<br><br>Crystals<br>grown using<br>ethylene<br>glycol |
| HEWL-<br>Ru <sup>II</sup> IM<br><br>First structure                                                                                                                             | -                                                   | 0.12                                                    | 0.18                                                                 | 0.30                                                                               |
| HEWL-<br>Ru <sup>II</sup> IM<br><br>Second<br>structure                                                                                                                         |                                                     | -                                                       | 0.14                                                                 | 0.28                                                                               |
| HEWL-<br>Ru <sup>II</sup> MIM<br><br>Crystals<br>grown using<br>NaCl                                                                                                            |                                                     |                                                         | -                                                                    | 0.28                                                                               |
| HEWL-<br>Ru <sup>II</sup> MIM<br><br>Crystals<br>grown using<br>ethylene<br>glycol                                                                                              |                                                     |                                                         |                                                                      | -                                                                                  |



**Table S4.** Root Mean Square Deviations values ( $\text{\AA}$ ) computed on CA atoms among RNase A adducts formed with Ru<sup>II</sup>IM Ru<sup>II</sup>MIM and Ru<sup>II</sup>MBI. data were compared also with the two RNase A molecules in the structure of the ligand-free RNase A solved from isomorphous crystals.

|                                             | RNase A-<br>Ru <sup>II</sup> IM<br>Chain A | RNase A-<br>Ru <sup>II</sup> IM<br>Chain B | RNase A-<br>Ru <sup>II</sup> MIM<br>Chain A | RNase A-<br>Ru <sup>II</sup> MIM<br>Chain B | RNase A-<br>Ru <sup>II</sup> MBI<br>Chain A | RNase A-<br>Ru <sup>II</sup> MBI<br>Chain B | Ligand-free<br>RNase A<br>Chain A<br>(1JVT) | Ligand-free<br>RNase A<br>Chain B<br>(1JVT)* |
|---------------------------------------------|--------------------------------------------|--------------------------------------------|---------------------------------------------|---------------------------------------------|---------------------------------------------|---------------------------------------------|---------------------------------------------|----------------------------------------------|
| RNase A-<br>Ru <sup>II</sup> IM<br>Chain A  | -                                          | 0.47                                       | 0.37                                        | 1.18                                        | 0.38                                        | 0.59                                        | 0.48                                        | 0.49                                         |
| RNase A-<br>Ru <sup>II</sup> IM<br>Chain B  |                                            | -                                          | 0.60                                        | 1.04                                        | 0.52                                        | 0.36                                        | 0.53                                        | 0.29                                         |
| RNase A-<br>Ru <sup>II</sup> MIM<br>Chain A |                                            |                                            | -                                           | 1.22                                        | 0.22                                        | 0.66                                        | 0.42                                        | 0.54                                         |
| RNase A-<br>Ru <sup>II</sup> MIM<br>Chain B |                                            |                                            |                                             | -                                           | 1.18                                        | 1.00                                        | 1.19                                        | 1.12                                         |
| RNase A-<br>Ru <sup>II</sup> MBI<br>Chain A |                                            |                                            |                                             |                                             | -                                           | 0.58                                        | 0.34                                        | 0.44                                         |
| RNase A-<br>Ru <sup>II</sup> MBI<br>Chain B |                                            |                                            |                                             |                                             |                                             | -                                           | 0.61                                        | 0.44                                         |
| Ligand-free<br>RNase A<br>Chain A           |                                            |                                            |                                             |                                             |                                             |                                             | -                                           | 0.48                                         |
| Ligand-free<br>RNase A<br>Chain B           |                                            |                                            |                                             |                                             |                                             |                                             |                                             | -                                            |

\*from reference 36 of the main text.

**Table S5.** Details of the structures of RuCORMs-RNase A adducts.

|                  | RNase A-Ru <sup>II</sup> IM                                                               | RNase A-Ru <sup>II</sup> MIM                                                              | RNase A-Ru <sup>II</sup> MBI                                                              |
|------------------|-------------------------------------------------------------------------------------------|-------------------------------------------------------------------------------------------|-------------------------------------------------------------------------------------------|
| Resolution (Å)   | 2.07                                                                                      | 1.98                                                                                      | 1.82                                                                                      |
| Rfactor/Rfree(%) | 18.1/27.2                                                                                 | 17.6/27.9                                                                                 | 16.5/23.6                                                                                 |
|                  | Ru<br>(Occupancy;<br>B-factor (Å <sup>2</sup> ))<br><br>Ru ligands<br>Equat. <b>Axial</b> | Ru<br>(Occupancy;<br>B-factor (Å <sup>2</sup> ))<br><br>Ru ligands<br>Equat. <b>Axial</b> | Ru<br>(Occupancy;<br>B-factor (Å <sup>2</sup> ))<br><br>Ru ligands<br>Equat. <b>Axial</b> |
| His105 mol A     | Ru<br>(0.7, 61.8) <b>x</b><br><br>CO<br>CO<br>Wat<br><br><b>x</b>                         | Ru<br>(0.7, 61.8) <b>x</b><br><br>CO<br>CO<br>Wat<br><br><b>x</b>                         | Ru<br>(0.5, 58.8) <b>x</b><br><br>CO<br>Wat<br>Wat<br><br><b>x</b>                        |
|                  | Anomalous peak:<br>rmsd, e <sup>-</sup> /Å <sup>3</sup><br>4.8; 0.20                      | Anomalous peak:<br>rmsd, e <sup>-</sup> /Å <sup>3</sup><br>.                              | Anomalous peak:<br>rmsd, e <sup>-</sup> /Å <sup>3</sup><br>2.4; 0.28                      |
| His119 mol B     | Ru<br>(0.6, 52.8) <b>wat</b><br><br>CO<br>Wat<br>Wat<br><br><b>x</b>                      | Ru<br>(0.7, 51.5) <b>CO</b><br><br>CO<br>CO<br>Wat<br><br><b>x</b>                        | Ru<br>(0.6, 44.0) <b>CO</b><br><br>CO<br>CO<br>Wat<br><br><b>x</b>                        |
|                  | Anomalous peak:<br>rmsd, e <sup>-</sup> /Å <sup>3</sup><br>3.5; 0.14                      | Anomalous peak:<br>rmsd, e <sup>-</sup> /Å <sup>3</sup><br>-                              | Anomalous peak:<br>rmsd, e <sup>-</sup> /Å <sup>3</sup><br>5.8; 0.68                      |
| His105 mol B     | Ru<br>(0.4, 52.7) <b>x</b><br><br>Wat<br>Wat<br>Wat<br><br><b>x</b>                       |                                                                                           |                                                                                           |
|                  | Anomalous peak:<br>rmsd, e <sup>-</sup> /Å <sup>3</sup><br>3.2; 0.13                      |                                                                                           |                                                                                           |

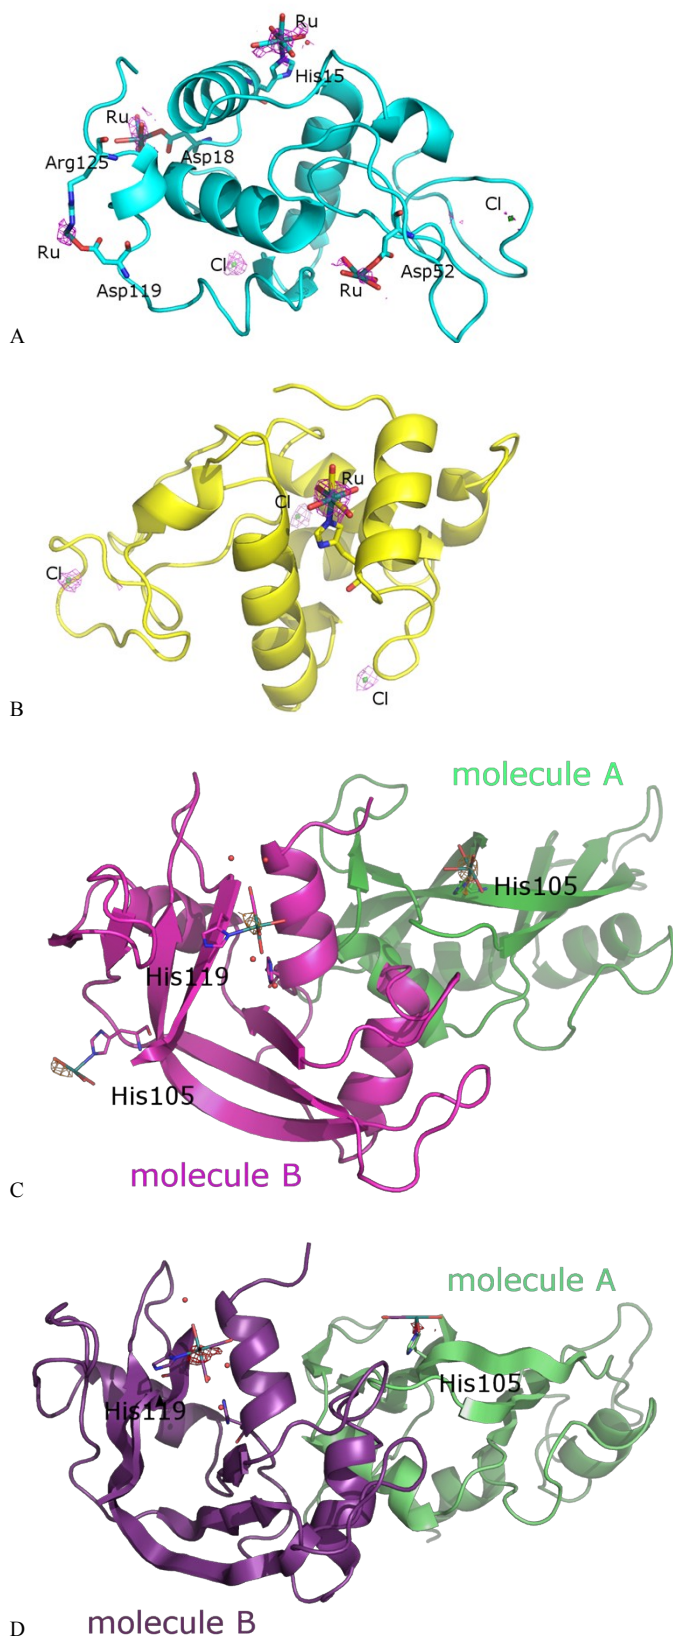

**Figure S1.** Anomalous maps for HEWL-Ru<sup>III</sup>IM (A, 3.0 $\sigma$  level), HEWL Ru<sup>II</sup>IM (B, 3.0 $\sigma$  level), RNase A-Ru<sup>III</sup>IM (C, 2.5 $\sigma$  level), RNase A-Ru<sup>II</sup>IMBI (D, 2.5 $\sigma$  level),
